# Supplementary material
Source: Springer Nature journal article supplement (https://www.springermedizin.de/resource/supplementary/12872_2013_692_MOESM2_ESM.pdf/9430686)

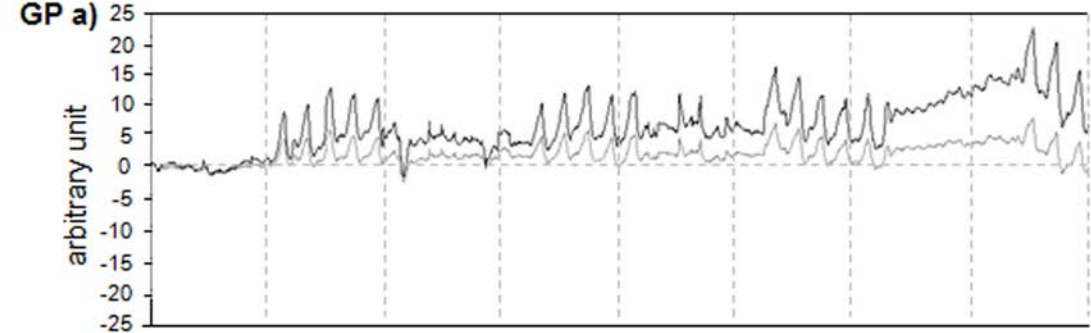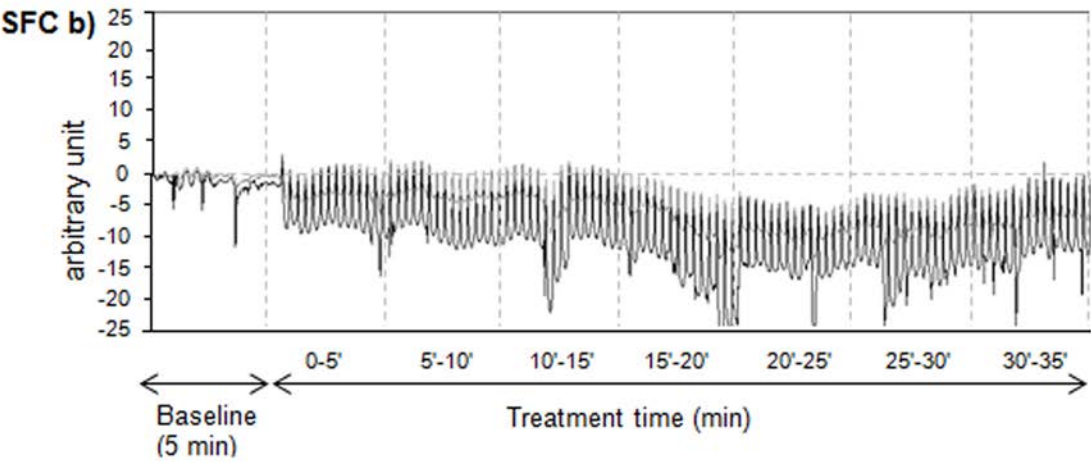

Supplement: MOESM2 [file 9430686]
